# Supplementary material for: Ambient atmosphere-processable, printable Cu electrodes for flexible device applications: structural welding on a millisecond timescale of surface oxide-free Cu nanoparticles
Source: Royal Society of Chemistry journal article supplement (doi:10.1039/c4nr06816e), 2015-01-01
Supplement: c4nr06816e1.pdf [file c4nr06816e1.pdf]

## Supplementary Inforamtion

### Ambient-Processable, Printable Cu Electrodes for Flexible Device Applications: Structural Welding on a Millisecond Timescale of Surface Oxide-Free Cu Nanoparticles

*Sang-Jin Oh, Yejin Jo, Eun Jung Lee, Sun Sook Lee, Young Hun Kang, Hye-Ji Jeon, Song Yun Cho, Jin-Seong Park, Yeong-Hui Seo, Beyong-Hwan Ryu, Youngmin Choi,\* Sunho Jeong\**

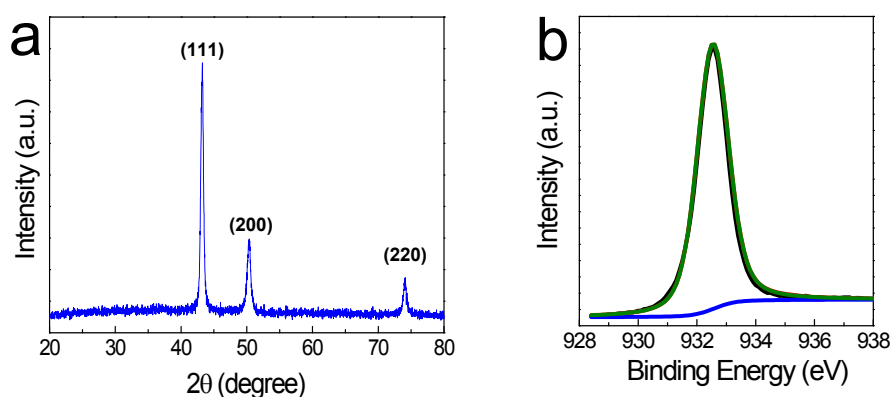

**Figure S1.** (a) X-ray diffraction results and (b) XPS Cu 2p<sub>3/2</sub> spectrum for surface oxide-free Cu nanoparticles. The presence of a single symmetric peak at 932.6 eV in the XPS Cu 2p<sub>3/2</sub> spectrum indicates the absence of any secondary phases due to oxides and impurity phases.

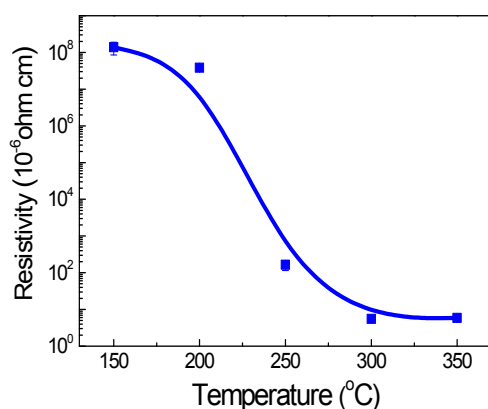

**Figure S2.** Resistivity evolution of Cu nano-particle films by annealing at different temperatures up to 350 °C for 2 hr under Ar atmosphere.

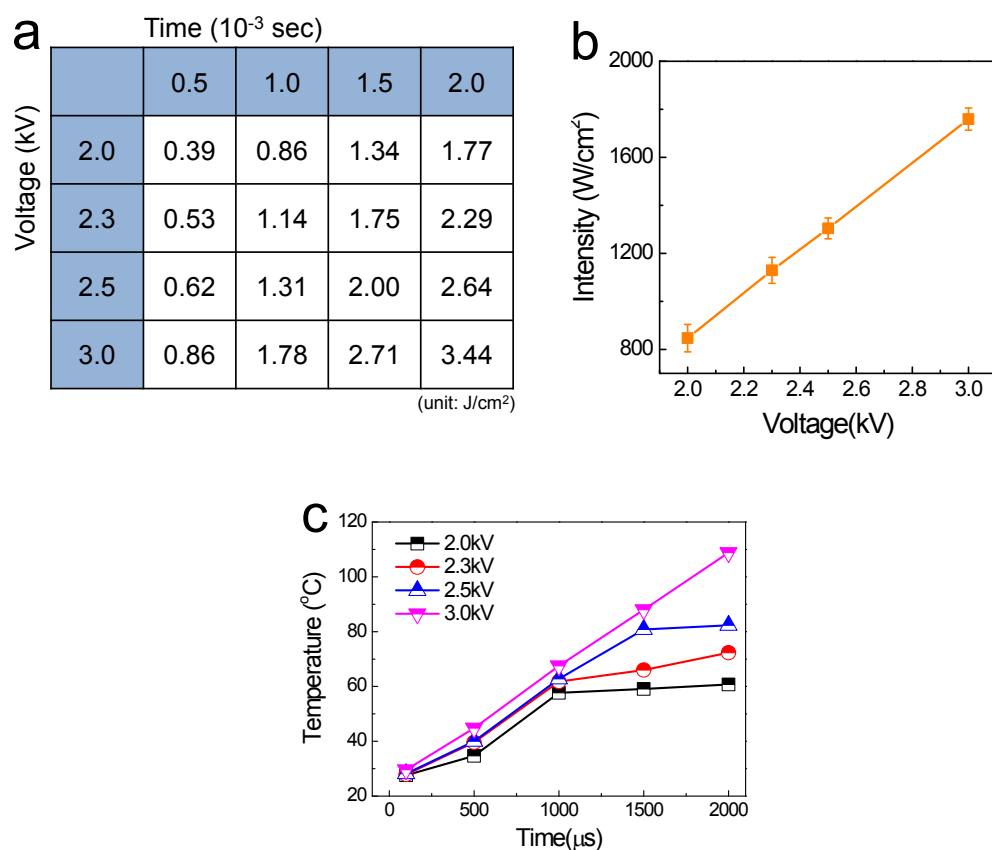

**Figure S3.** For a B-type lamp, (a) the variation of photon energies as a function of voltage and duration time, (b) the variation of intensity depending on the applied voltage in the range of 2.0~3.0 kV, and (c) the variation of substrate temperature as a function of voltage and duration time.

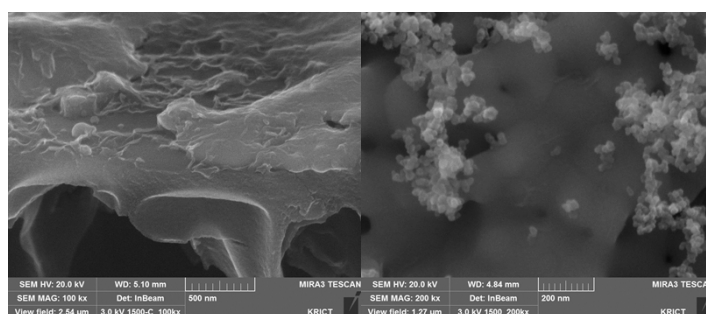

**Figure S4.** Cross-sectional and top-view SEM images for Cu nano-particulate films prepared on polyimide substrates after photonic sintering at 3.0 kV for 1.5 msec. The polyimide substrate was found to be significantly damaged and a part of Cu nanoparticles were present on the damaged polyimide substrate.

|              |     | Time ( $10^{-3}$ sec)                                                                                                                                                                                                                                                                                                                                                                |     |      |      |
|--------------|-----|--------------------------------------------------------------------------------------------------------------------------------------------------------------------------------------------------------------------------------------------------------------------------------------------------------------------------------------------------------------------------------------|-----|------|------|
|              |     | 0.5                                                                                                                                                                                                                                                                                                                                                                                  | 1.0 | 1.5  | 2.0  |
| Voltage (kV) | 2.0 |                                                                                                                                                                                                                                                                                                                                                                                      |     | 12.1 | 11.3 |
|              | 2.3 |                                                                                                                                                                                                                                                                                                                                                                                      |     | 17.0 | 11.0 |
|              | 2.5 |                                                                                                                                                                                                                                                                                                                                                                                      | 8.9 | 7.1  | 7.2  |
|              | 3.0 |                                                                                                                                                                                                                                                                                                                                                                                      | 6.7 |      |      |
|              |     | (unit: $10^{-6} \Omega\text{cm}$ )                                                                                                                                                                                                                                                                                                                                                   |     |      |      |
|              |     | <div style="display: flex; justify-content: space-around; align-items: center;"> <span style="display: inline-block; width: 15px; height: 10px; background-color: #4a7ebb; border: 1px solid black;"></span> resistive           <span style="display: inline-block; width: 15px; height: 10px; background-color: #cc0000; border: 1px solid black;"></span> peel-off         </div> |     |      |      |

**Figure S5.** Resistivity evolution of Cu nano-particulate films drop-casted on polyimide substrates depending on voltage and duration time for generating photons from UV lamp.

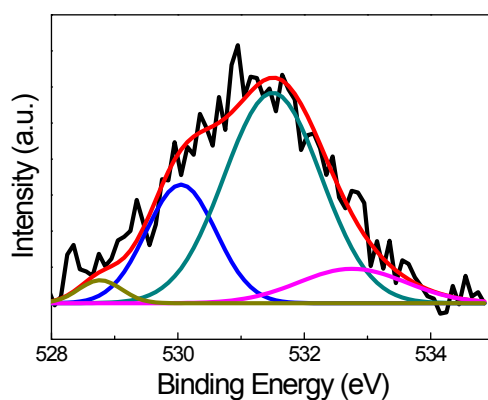

**Figure S6.** XPS O 1s spectrum for Cu nano-particulate films photo-sintered at 2.5 kV for 1.5 msec. The peaks positioned at 528.8, 530.1, 531.5, and 532.8 eV are attributable to  $\text{Cu}_2\text{O}$ ,  $\text{C}=\text{O}$ ,  $\text{C}-\text{O}$ , and unknown phase, respectively. Prior to XPS analysis, the samples were etched for 390 sec to get rid of contaminated surfaces.

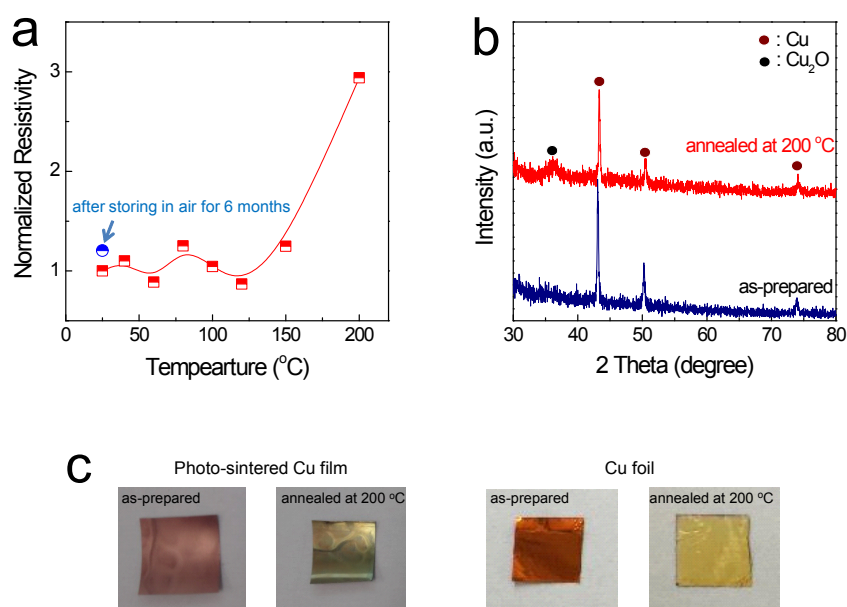

Figure S7. (a) Variation of normalized resistivity of photo-sintered Cu films as a function of annealing temperatures upto 200 °C, (b) XRD results for photo-sintered Cu films before/after annealing at 200 °C, (c) photographs for photo-sintered Cu films and Cu foils before/after annealing at 200 °C.

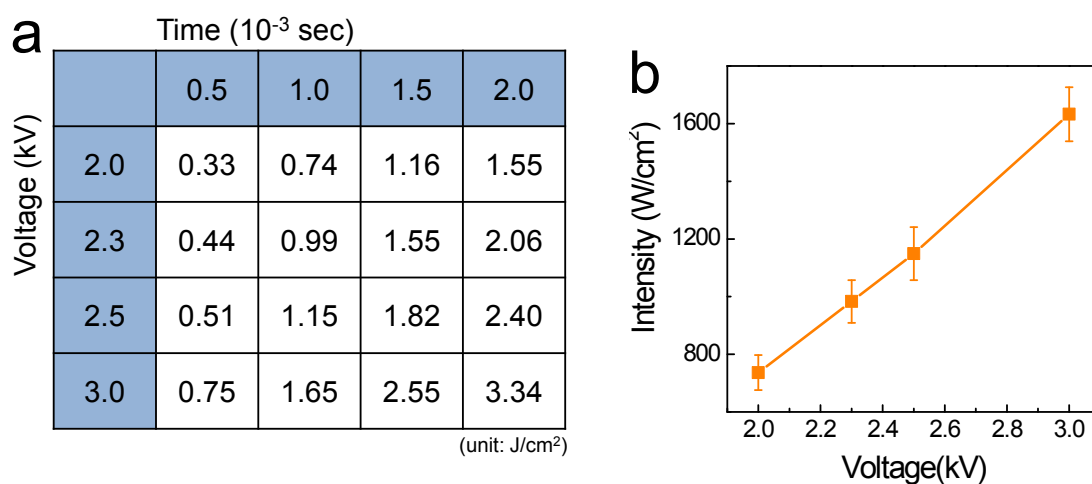

**Figure S8.** For an A-type lamp, (a) the variation of photon energies as a function of voltage and duration time, (b) the variation of intensity depending on the applied voltage in the range of 2.0~3.0 kV.

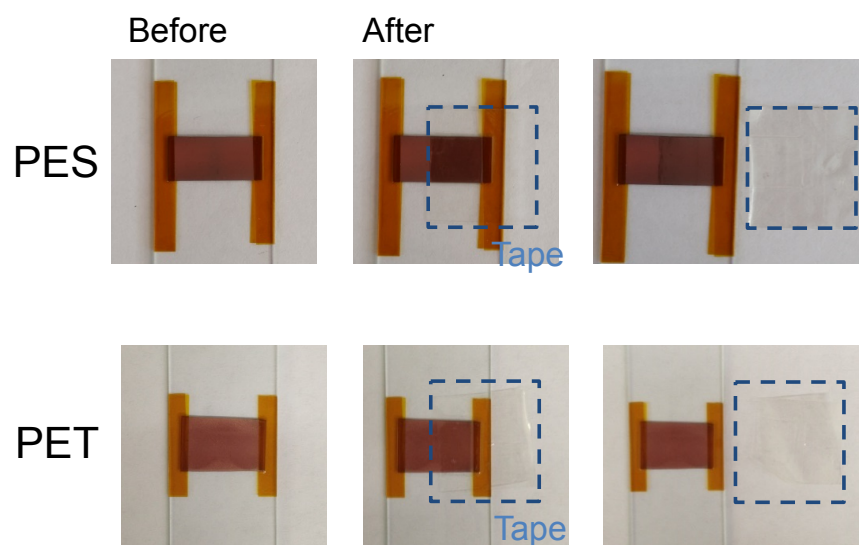

**Figure S9.** Adhesion tests for photo-sintered Cu layers on PES and PET substrates. The Cu layers for the PES and PET substrates were photo-sintered at 2.0 kV for 1.5 msec, and at 2.3 kV for 1.5 msec, respectively.
